# Supplementary material
Source: publisher site journal article supplement (https://www.dovepress.com/article/487595)
Supplement: Supplementary file 1 [file get_supplementary_file.php]

**Supplementary Materials**

**Supplementary Table 1. Description of Selected Features.**

| **Features** | **Descriptions** |
| --- | --- |
| **Age** | Age of the patient at the time of the follow-up. |
| **Gender** | Males and females. |
| **White Blood Cell Count (WBC)** | The number of white blood cells in the blood, measured at 6:00 AM, fasting state. |
| **Lymphocyte Count (LYM)** | The number of lymphocytes in the blood, measured at 6:00 AM, fasting state. |
| **Neutrophil Count (NEU)** | The number of neutrophils in the blood, measured at 6:00 AM, fasting state. |
| **Hemoglobin Count (HB)** | The concentration of hemoglobin in the blood, measured at 6:00 AM, fasting state. |
| **Platelet Count (PLT)** | The number of platelets in the blood, measured at 6:00 AM, fasting state. |
| **Glucose (GLU)** | The level of glucose in the blood, measured at 6:00 AM, fasting state. |
| **Uric Acid (UA)** | The level of uric acid in the blood, measured at 6:00 AM, fasting state. |
| **Total Cholesterol (TC)** | The total cholesterol level in the blood, measured at 6:00 AM, fasting state. |
| **Low-Density Lipoprotein (LDL)** | The level of LDL cholesterol in the blood, measured at 6:00 AM, fasting state. |
| **High-Density Lipoprotein (HDL)** | The level of HDL cholesterol in the blood, measured at 6:00 AM, fasting state. |
| **Triglycerides (TG)** | The level of triglycerides in the blood, measured at 6:00 AM, fasting state. |
| **Lactate Dehydrogenase (LDH)** | The level of lactate dehydrogenase in the blood, measured at 6:00 AM, fasting state. |
| **Alpha-Fetoprotein (AFP)** | The level of alpha-fetoprotein in the blood, measured at 6:00 AM, fasting state. |
| **Carcinoembryonic Antigen (CEA)** | The level of carcinoembryonic antigen in the blood, measured at 6:00 AM, fasting state. |
| **Erythrocytes Sedimentation Rate (ESR)** | The rate at which erythrocytes sediment in one hour, measured at 6:00 AM, fasting state. |
| **C-Reactive Protein (CRP)** | The level of C-reactive protein in the blood, measured at 6:00 AM, fasting state. |
| **Rheumatic Factor (Rf)** | The presence of rheumatoid factor in the blood, measured at 6:00 AM, fasting state. |
| **Anti-streptococcal Hemolysin O (ASO)** | The level of anti-streptococcal hemolysin O antibodies in the blood, measured at 6:00 AM, fasting state. |
| **Joint Swelling (JS)** | The presence of swelling in the joints, determined by the primary physician and recorded in the electronic medical record. |
| **Joint Tenderness (JT)** | The sensitivity or pain experienced when pressure is applied to a joint, determined by the primary physician and recorded in the electronic medical record. |
| **Limited Joint Movement (LJM)** | The reduction in the range of motion of a joint, determined by the primary physician and recorded in the electronic medical record. |
| **Joint Deformity (JD)** | The abnormal shape or alignment of a joint, determined by the primary physician and recorded in the electronic medical record. |
| **Raynaud’s Phenomenon (RP)** | A condition characterized by episodes of reduced blood flow to the extremities, typically triggered by cold or stress, determined by the primary physician and recorded in the electronic medical record. |
| **Morning Stiffness Greater Than 30 Minutes (MS)** | The experience of prolonged joint stiffness upon waking, determined by the primary physician and recorded in the electronic medical record. |

**Supplementary Table 2. Characteristics of the Developing Cohorts**

| Features | Total  (n = 2106) | Non-RA  (n = 1096) | RA  (n = 1010) | T/Z/χ² | *P* |
| --- | --- | --- | --- | --- | --- |
|
| GLU, Mean ± SD | 4.89 ± 1.10 | 4.95 ± 1.14 | 4.83 ± 1.06 | t=2.47 | 0.014 |
| TC, Mean ± SD | 4.70 ± 1.07 | 4.90 ± 1.11 | 4.49 ± 0.97 | t=9.08 | <.001 |
| WBC, Mean ± SD | 6.32 ± 2.04 | 6.19 ± 1.92 | 6.45 ± 2.17 | t=-2.88 | 0.004 |
| HB, Mean ± SD | 125.18 ± 21.09 | 134.49 ± 20.45 | 115.08 ± 16.66 | t=23.96 | <.001 |
| Age, M (Q₁, Q₃) | 44.00 (34.00, 55.00) | 40.00 (32.00, 51.00) | 48.00 (38.00, 60.00) | Z=-11.52 | <.001 |
| UA, M (Q₁, Q₃) | 329.48 (268.00, 380.75) | 329.48 (305.00, 407.00) | 292.00 (238.00, 349.00) | Z=-14.39 | <.001 |
| TG, M (Q₁, Q₃) | 1.12 (0.80, 1.47) | 1.21 (0.83, 1.59) | 1.00 (0.76, 1.34) | Z=-6.31 | <.001 |
| HDL, M (Q₁, Q₃) | 1.27 (1.04, 1.48) | 1.30 (1.08, 1.47) | 1.24 (1.02, 1.49) | Z=-1.84 | 0.066 |
| LDL, M (Q₁, Q₃) | 2.91 (2.35, 3.39) | 2.96 (2.57, 3.62) | 2.72 (2.18, 3.14) | Z=-10.86 | <.001 |
| LDH, M (Q₁, Q₃) | 176.94 (156.00, 183.00) | 176.94 (158.00, 188.00) | 176.94 (153.00, 176.94) | Z=-3.17 | 0.002 |
| NEU, M (Q₁, Q₃) | 3.47 (2.63, 4.53) | 3.29 (2.62, 4.15) | 3.65 (2.67, 4.90) | Z=-5.43 | <.001 |
| LYM, M (Q₁, Q₃) | 1.84 (1.41, 2.32) | 1.92 (1.53, 2.40) | 1.71 (1.32, 2.17) | Z=-7.52 | <.001 |
| PLT, M (Q₁, Q₃) | 248.00 (206.00, 298.00) | 243.00 (201.75, 281.00) | 256.33 (211.00, 316.75) | Z=-5.46 | <.001 |
| ESR, M (Q₁, Q₃) | 18.00 (8.00, 35.75) | 12.00 (6.00, 23.00) | 28.00 (13.00, 50.00) | Z=-18.21 | <.001 |
| AFP, M (Q₁, Q₃) | 2.50 (1.72, 3.17) | 2.70 (1.90, 3.30) | 2.30 (1.60, 2.91) | Z=-6.75 | <.001 |
| CEA, M (Q₁, Q₃) | 1.50 (1.00, 1.90) | 1.60 (1.00, 1.80) | 1.40 (0.90, 2.00) | Z=-1.18 | 0.236 |
| ASO, M (Q₁, Q₃) | 52.50 (29.13, 87.28) | 54.40 (29.90, 86.82) | 51.55 (28.40, 87.47) | Z=-1.36 | 0.173 |
| CRP, M (Q₁, Q₃) | 2.76 (0.83, 10.62) | 1.50 (0.64, 5.76) | 7.35 (1.51, 18.04) | Z=-16.15 | <.001 |
| Rf, M (Q₁, Q₃) | 13.30 (10.00, 89.20) | 10.00 (10.00, 12.10) | 72.65 (21.80, 172.62) | Z=-31.82 | <.001 |
| Gender, n(%) |  |  |  | χ²=215.22 | <.001 |
| Male | 697 (33.10) | 521 (47.54) | 176 (17.43) |  |  |
| Female | 1409 (66.90) | 575 (52.46) | 834 (82.57) |  |  |
| JS, n(%) |  |  |  | χ²=915.49 | <.001 |
| 0 | 1198 (56.89) | 967 (88.23) | 231 (22.87) |  |  |
| 1 | 908 (43.11) | 129 (11.77) | 779 (77.13) |  |  |
| JM, n(%) |  |  |  | χ²=2.89 | 0.089 |
| 0 | 2042 (96.96) | 1056 (96.35) | 986 (97.62) |  |  |
| 1 | 64 (3.04) | 40 (3.65) | 24 (2.38) |  |  |
| MS, n(%) |  |  |  | χ²=974.61 | <.001 |
| 0 | 1355 (64.34) | 1048 (95.62) | 307 (30.40) |  |  |
| 1 | 751 (35.66) | 48 (4.38) | 703 (69.60) |  |  |
| JD, n(%) |  |  |  | χ²=243.49 | <.001 |
| 0 | 1851 (87.89) | 1080 (98.54) | 771 (76.34) |  |  |
| 1 | 255 (12.11) | 16 (1.46) | 239 (23.66) |  |  |
| RP, n(%) |  |  |  | χ²=17.65 | <.001 |
| 0 | 2063 (97.96) | 1060 (96.72) | 1003 (99.31) |  |  |
| 1 | 43 (2.04) | 36 (3.28) | 7 (0.69) |  |  |
| JT, n(%) |  |  |  | χ²=918.09 | <.001 |
| 0 | 1121 (53.23) | 930 (84.85) | 191 (18.91) |  |  |
| 1 | 985 (46.77) | 166 (15.15) | 819 (81.09) |  |  |

Z: Mann-Whitney test, χ²: Chi-square test

M: Median, Q₁: 1st Quartile, Q₃: 3st Quartile

**Supplementary Table 3. Characteristics of the Final 11 features of Validation Cohorts**

| Features | Total  (n = 473) | Non-RA  (n = 373) | | | RA  (n = 100) | Z/χ² | P |
| --- | --- | --- | --- | --- | --- | --- | --- |
|  |
| Age, M (Q₁, Q₃) | 52.00 (42.00, 61.00) | | | 52.00 (42.00, 62.00) | 52.50 (41.75, 60.00) | Z=-0.06 | 0.954 |  |
| HB, M (Q₁, Q₃) | 132.00 (120.00, 143.00) | | 134.00 (123.00, 145.00) | | 124.00 (113.00, 132.00) | Z=-5.97 | <.001 |  |
| PLT, M (Q₁, Q₃) | 227.50 (196.00, 272.00) | | 224.00 (191.50, 266.50) | | 245.00 (209.00, 285.00) | Z=-2.61 | 0.009 |  |
| CRP, M (Q₁, Q₃) | 1.94 (0.68, 4.20) | | 1.73 (0.66, 3.50) | | 3.63 (1.18, 8.73) | Z=-4.16 | <.001 |  |
| ESR, M (Q₁, Q₃) | 16.00 (8.00, 31.50) | | 12.00 (6.00, 21.00) | | 33.00 (20.00, 51.00) | Z=-8.35 | <.001 |  |
| RF, M (Q₁, Q₃) | 10.00 (4.50, 42.83) | | 5.45 (4.00, 10.00) | | 61.10 (22.72, 102.95) | Z=-10.63 | <.001 |  |
| UA, M (Q₁, Q₃) | 325.00 (269.75, 392.50) | | 330.00 (278.50, 403.00) | | 292.00 (254.00, 353.00) | Z=-3.51 | <.001 |  |
| JS, n(%) |  | |  | |  | χ²=108.44 | <.001 |  |
| 0 | 285 (60.25) | | 270 (72.39) | | 15 (15.00) |  |  |  |
| 1 | 188 (39.75) | | 103 (27.61) | | 85 (85.00) |  |  |  |
| MS, n(%) |  | |  | |  | χ²=304.80 | <.001 |  |
| 0 | 374 (79.07) | | 358 (95.98) | | 16 (16.00) |  |  |  |
| 1 | 99 (20.93) | | 15 (4.02) | | 84 (84.00) |  |  |  |
| JD, n(%) |  | |  | |  | χ²=61.74 | <.001 |  |
| 0 | 435 (91.97) | | 362 (97.05) | | 73 (73.00) |  |  |  |
| 1 | 38 (8.03) | | 11 (2.95) | | 27 (27.00) |  |  |  |
| JT, n(%) |  | |  | |  | χ²=127.62 | <.001 |  |
| 0 | 251 (53.07) | | 248 (66.49) | | 3 (3.00) |  |  |  |
| 1 | 222 (46.93) | | 125 (33.51) | | 97 (97.00) |  |  |  |

Z: Mann-Whitney test, χ²: Chi-square test

M: Median, Q₁: 1st Quartile, Q₃: 3st Quartile

**Supplementary Table 4. Univariate and multivariate Logistics Regression Results of Developing Cohort**

|  | **Univariate** |  |  |  |  |  |  | **Multivariate** |  |  |  |  |
| --- | --- | --- | --- | --- | --- | --- | --- | --- | --- | --- | --- | --- |
| β | S.E | Z |  | *P* | OR (95%CI) |  | β | S.E | Z | *P* | OR (95%CI) |
| Age | 0.04 | 0.00 | 11.59 |  | <.001 | 1.04 (1.03 ~ 1.05) |  | 0.04 | 0.01 | 5.11 | <.001 | 1.04 (1.03 ~ 1.06) |
| GLU | -0.11 | 0.04 | -2.40 |  | 0.016 | 0.90 (0.82 ~ 0.98) |  | -0.28 | 0.12 | -2.30 | 0.021 | 0.75 (0.59 ~ 0.96) |
| UA | -0.01 | 0.00 | -13.21 |  | <.001 | 0.99 (0.99 ~ 0.99) |  | -0.00 | 0.00 | -1.38 | 0.166 | 1.00 (1.00 ~ 1.00) |
| TC | -0.38 | 0.04 | -8.66 |  | <.001 | 0.68 (0.62 ~ 0.74) |  | -1.65 | 0.39 | -4.25 | <.001 | 0.19 (0.09 ~ 0.41) |
| TG | -0.35 | 0.06 | -5.66 |  | <.001 | 0.70 (0.62 ~ 0.79) |  | 0.16 | 0.17 | 0.91 | 0.365 | 1.17 (0.83 ~ 1.64) |
| HDL | 0.38 | 0.08 | 4.56 |  | <.001 | 1.46 (1.24 ~ 1.72) |  | 2.06 | 0.48 | 4.25 | <.001 | 7.83 (3.03 ~ 20.22) |
| LDL | -0.60 | 0.06 | -10.70 |  | <.001 | 0.55 (0.49 ~ 0.61) |  | 1.76 | 0.43 | 4.07 | <.001 | 5.83 (2.49 ~ 13.65) |
| LDH | -0.00 | 0.00 | -1.08 |  | 0.280 | 1.00 (1.00 ~ 1.00) |  |  |  |  |  |  |
| WBC | 0.06 | 0.02 | 2.88 |  | 0.004 | 1.06 (1.02 ~ 1.11) |  | 0.72 | 0.34 | 2.12 | 0.034 | 2.05 (1.06 ~ 3.98) |
| NEU | 0.17 | 0.03 | 5.98 |  | <.001 | 1.18 (1.12 ~ 1.25) |  | -0.53 | 0.35 | -1.50 | 0.134 | 0.59 (0.29 ~ 1.18) |
| LYM | -0.39 | 0.06 | -6.05 |  | <.001 | 0.68 (0.60 ~ 0.77) |  | -0.87 | 0.39 | -2.20 | 0.028 | 0.42 (0.19 ~ 0.91) |
| HB | -0.05 | 0.00 | -19.03 |  | <.001 | 0.95 (0.94 ~ 0.95) |  | -0.02 | 0.01 | -2.60 | 0.009 | 0.98 (0.96 ~ 0.99) |
| PLT | 0.01 | 0.00 | 6.59 |  | <.001 | 1.01 (1.01 ~ 1.01) |  | 0.00 | 0.00 | 0.75 | 0.451 | 1.00 (1.00 ~ 1.00) |
| ESR | 0.04 | 0.00 | 16.11 |  | <.001 | 1.04 (1.04 ~ 1.05) |  | -0.01 | 0.01 | -1.69 | 0.092 | 0.99 (0.97 ~ 1.00) |
| AFP | -0.07 | 0.03 | -2.64 |  | 0.008 | 0.93 (0.89 ~ 0.98) |  | -0.02 | 0.04 | -0.48 | 0.631 | 0.98 (0.91 ~ 1.06) |
| CEA | 0.06 | 0.04 | 1.61 |  | 0.108 | 1.06 (0.99 ~ 1.15) |  |  |  |  |  |  |
| ASO | -0.00 | 0.00 | -0.08 |  | 0.935 | 1.00 (1.00 ~ 1.00) |  |  |  |  |  |  |
| CRP | 0.08 | 0.01 | 12.64 |  | <.001 | 1.08 (1.07 ~ 1.09) |  | 0.02 | 0.01 | 2.12 | 0.034 | 1.02 (1.01 ~ 1.04) |
| RF | 0.03 | 0.00 | 17.65 |  | <.001 | 1.03 (1.03 ~ 1.03) |  | 0.02 | 0.00 | 7.47 | <.001 | 1.02 (1.01 ~ 1.02) |
| Gender |  |  |  |  |  |  |  |  |  |  |  |  |
| Male |  |  |  |  |  | 1.00 (Reference) |  |  |  |  |  | 1.00 (Reference) |
| Female | 1.46 | 0.10 | 14.19 |  | <.001 | 4.29 (3.51 ~ 5.25) |  | 1.03 | 0.30 | 3.44 | <.001 | 2.81 (1.56 ~ 5.05) |
| JS |  |  |  |  |  |  |  |  |  |  |  |  |
| 0 |  |  |  |  |  | 1.00 (Reference) |  |  |  |  |  | 1.00 (Reference) |
| 1 | 3.23 | 0.12 | 26.92 |  | <.001 | 25.28 (19.98 ~ 31.98) |  | 1.75 | 0.21 | 8.52 | <.001 | 5.75 (3.85 ~ 8.60) |
| JM |  |  |  |  |  |  |  |  |  |  |  |  |
| 0 |  |  |  |  |  | 1.00 (Reference) |  |  |  |  |  |  |
| 1 | -0.44 | 0.26 | -1.69 |  | 0.091 | 0.64 (0.38 ~ 1.07) |  |  |  |  |  |  |
| MS |  |  |  |  |  |  |  |  |  |  |  |  |
| 0 |  |  |  |  |  | 1.00 (Reference) |  |  |  |  |  | 1.00 (Reference) |
| 1 | 3.91 | 0.16 | 24.05 |  | <.001 | 50.00 (36.35 ~ 68.77) |  | 3.16 | 0.24 | 13.20 | <.001 | 23.59 (14.75 ~ 37.73) |
| JD |  |  |  |  |  |  |  |  |  |  |  |  |
| 0 |  |  |  |  |  | 1.00 (Reference) |  |  |  |  |  | 1.00 (Reference) |
| 1 | 3.04 | 0.26 | 11.58 |  | <.001 | 20.92 (12.51 ~ 35.00) |  | 0.87 | 0.39 | 2.25 | 0.024 | 2.39 (1.12 ~ 5.12) |
| RP |  |  |  |  |  |  |  |  |  |  |  |  |
| 0 |  |  |  |  |  | 1.00 (Reference) |  |  |  |  |  | 1.00 (Reference) |
| 1 | -1.58 | 0.42 | -3.81 |  | <.001 | 0.21 (0.09 ~ 0.46) |  | -2.71 | 0.77 | -3.53 | <.001 | 0.07 (0.01 ~ 0.30) |
| JT |  |  |  |  |  |  |  |  |  |  |  |  |
| 0 |  |  |  |  |  | 1.00 (Reference) |  |  |  |  |  | 1.00 (Reference) |
| 1 | 3.18 | 0.12 | 27.30 |  | <.001 | 24.02 (19.12 ~ 30.18) |  | 2.39 | 0.21 | 11.24 | <.001 | 10.92 (7.20 ~ 16.57) |

OR: Odds Ratio, CI: Confidence Interval

**Supplementary Table 5. Results from Primary Healthcare Clinic 1**

| Risk factor | Accuracy%[95%CI] | Specificity%[95%CI] | Sensitivity%[95%CI] | AUC%[95%CI] |
| --- | --- | --- | --- | --- |
| 0% | 23.15[17.14, 29.16] | 0.00[0.00, 0.00] | 100.00[97.92, 100.00] | 50.00[42.78, 57.22] |
| 1% | 37.25[30.37, 44.13] | 18.34[12.48, 24.20] | 100.00[97.92, 100.00] | 59.17[52.39, 65.95] |
| 2% | 44.30[37.39, 51.21] | 27.51[21.20, 33.83] | 100.00[97.92, 100.00] | 63.76[57.39, 70.13] |
| 3% | 48.32[41.44, 55.19] | 32.75[26.17, 39.33] | 100.00[97.92, 100.00] | 66.38[60.16, 72.60] |
| 4% | 52.68[45.79, 59.57] | 38.43[31.63, 45.24] | 100.00[97.92, 100.00] | 69.21[63.27, 75.14] |
| 5% | 54.70[47.87, 61.53] | 41.05[34.14, 47.95] | 100.00[97.92, 100.00] | 70.52[64.57, 76.47] |
| 6% | 57.05[50.07, 63.97] | 44.10[37.14, 51.06] | 100.00[97.92, 100.00] | 72.05[66.06, 78.04] |
| 7% | 60.07[53.14, 67.01] | 48.04[41.00, 55.08] | 100.00[97.92, 100.00] | 74.02[68.00, 80.04] |
| 8% | 62.42[55.47, 69.37] | 51.09[44.00, 58.18] | 100.00[97.92, 100.00] | 75.55[69.52, 81.58] |
| 9% | 64.43[57.43, 71.43] | 53.71[46.65, 60.77] | 100.00[97.92, 100.00] | 76.86[70.84, 82.88] |
| 10% | 67.11[60.16, 74.06] | 57.21[50.18, 64.24] | 100.00[97.92, 100.00] | 78.60[72.61, 84.59] |
| 11% | 67.79 [60.87, 74.71] | 58.08 [50.77, 65.39] | 100.00 [97.92, 100.00] | 79.04 [73.01, 85.07] |
| 12% | 68.79 [61.92, 75.66] | 59.39 [52.11, 66.67] | 100.00 [97.92, 100.00] | 79.69 [73.73, 85.65] |
| 13% | 70.13 [63.35, 76.91] | 61.14 [53.92, 68.36] | 100.00 [97.92, 100.00] | 80.57 [74.71, 86.43] |
| 14% | 72.15 [65.51,78.79] | 63.76 [56.64, 70.88] | 100.00 [97.92, 100.00] | 81.88 [76.17, 87.59] |
| 15% | 72.48 [65.86, 79.10] | 64.19 [57.09, 71.29] | 100.00 [97.92, 100.00] | 82.10 [76.42, 87.78] |
| 16% | 73.49 [66.95, 80.03] | 65.94 [58.92, 72.96] | 98.55 [96.78, 100.00] | 82.24 [76.58, 87.90] |
| 17% | 73.83 [67.32, 80.34] | 66.38 [59.38, 73.38] | 98.55 [96.78, 100.00] | 82.46 [76.83, 88.09] |
| 18% | 75.17 [68.77, 81.57] | 68.12 [61.22, 75.02] | 98.55 [96.78, 100.00] | 83.34 [77.82, 88.86] |
| 19% | 75.84 [69.50, 82.18] | 69.00 [62.15, 75.85] | 98.55 [96.78, 100.00] | 83.77 [78.31, 89.23] |
| 20% | 76.17 [69.86, 82.48] | 69.43 [62.60, 76.26] | 98.55 [96.78, 100.00] | 83.99 [78.56, 89.42] |
| 21% | 76.85 [70.60, 83.10] | 70.31 [63.54, 77.08] | 98.55 [96.78, 100.00] | 84.43 [79.06, 89.80] |
| 22% | 77.18 [70.96, 83.40] | 70.74 [64.00, 77.48] | 98.55 [96.78, 100.00] | 84.65 [79.31, 89.99] |
| 23% | 78.19 [72.07, 84.31] | 72.05 [65.40, 78.70] | 98.55 [96.78, 100.00] | 85.30 [80.05, 90.55] |
| 24% | 79.19 [73.18, 85.20] | 73.36 [66.81, 79.91] | 98.55 [96.78, 100.00] | 85.96 [80.81, 91.11] |
| 25% | 79.87 [73.93, 85.81] | 74.67 [68.23, 81.11] | 97.10 [94.61, 99.59] | 85.89 [80.73, 91.05] |
| 26% | 80.20 [74.30, 86.10] | 75.11 [68.70, 81.52] | 97.10 [94.61, 99.59] | 86.11 [80.99, 91.23] |
| 27% | 80.87 [75.04, 86.70] | 75.98 [69.65, 82.31] | 97.10 [94.61, 99.59] | 86.54 [81.48, 91.60] |
| 28% | 80.87 [75.04, 86.70] | 75.98 [69.65, 82.31] | 97.10 [94.61, 99.59] | 86.54 [81.48, 91.60] |
| 29% | 80.87 [75.04, 86.70] | 75.98 [69.65, 82.31] | 97.10 [94.61, 99.59] | 86.54 [81.48, 91.60] |
| 30% | 81.88 [76.17, 87.59] | 77.29 [71.08, 83.50] | 97.10 [94.61, 99.59] | 87.20 [82.25, 92.15] |
| 31% | 82.21 [76.54, 87.88] | 77.73 [71.57, 83.89] | 97.10 [94.61, 99.59] | 87.42 [82.51, 92.33] |
| 32% | 82.89 [77.31, 88.47] | 78.60 [72.52, 84.68] | 97.10 [94.61, 99.59] | 87.85 [83.01, 92.69] |
| 33% | 83.56 [78.07, 89.05] | 79.48 [73.50, 85.46] | 97.10 [94.61, 99.59] | 88.29 [83.53, 93.05] |
| 34% | 84.23 [78.83, 89.63] | 80.35 [74.46, 86.24] | 97.10 [94.61, 99.59] | 88.73 [84.04, 93.42] |
| 35% | 84.56 [79.21, 89.91] | 80.79 [74.95, 86.63] | 97.10 [94.61, 99.59] | 88.94 [84.29, 93.59] |
| 36% | 84.56 [79.21, 89.91] | 80.79 [74.95, 86.63] | 97.10 [94.61, 99.59] | 88.94 [84.29, 93.59] |
| 37% | 84.90 [79.60, 90.20] | 81.22 [75.43, 87.01] | 97.10 [94.61, 99.59] | 89.16 [84.55, 93.77] |
| 38% | 85.23 [79.97, 90.49] | 81.66 [75.93, 87.39] | 97.10 [94.61, 99.59] | 89.38 [84.82, 93.94] |
| 39% | 85.57 [80.36, 90.78] | 82.10 [76.42, 87.78] | 97.10 [94.61, 99.59] | 89.60 [85.08, 94.12] |
| 40% | 86.24 [81.14, 91.34] | 82.97 [77.40, 88.54] | 97.10 [94.61, 99.59] | 90.04 [85.60, 94.48] |
| 41% | 86.58 [81.53, 91.63] | 83.41 [77.90, 88.92] | 97.10 [94.61, 99.59] | 90.25 [85.85, 94.65] |
| 42% | 86.91 [81.91, 91.91] | 83.84 [78.39, 89.29] | 97.10 [94.61, 99.59] | 90.47 [86.12, 94.82] |
| 43% | 87.58 [82.69, 92.47] | 84.72 [79.39, 90.05] | 97.10 [94.61, 99.59] | 90.91 [86.65, 95.17] |
| 44% | 87.25 [82.31, 92.19] | 84.72 [79.39, 90.05] | 95.65 [92.63, 98.67] | 90.18 [85.77, 94.59] |
| 45% | 87.58 [82.69, 92.47] | 85.15 [79.88, 90.42] | 95.65 [92.63, 98.67] | 90.40 [86.04, 94.76] |
| 46% | 88.26 [83.49, 93.03] | 86.03 [80.89, 91.17] | 95.65 [92.63, 98.67] | 90.84 [86.57, 95.11] |
| 47% | 88.93 [84.28, 93.58] | 86.90 [81.90, 91.90] | 95.65 [92.63, 98.67] | 91.28 [87.10, 95.46] |
| 48% | 89.26 [84.67, 93.85] | 87.34 [82.41, 92.27] | 95.65 [92.63, 98.67] | 91.49 [87.36, 95.62] |
| 49% | 89.60 [85.08, 94.12] | 87.77 [82.92, 92.62] | 95.65 [92.63, 98.67] | 91.71 [87.62, 95.80] |
| 50% | 89.93 [85.47, 94.39] | 88.21 [83.43, 92.99] | 95.65 [92.63, 98.67] | 91.93 [87.89, 95.97] |
| 51% | 90.94 [86.69, 95.19] | 89.52 [84.98, 94.06] | 95.65 [92.63, 98.67] | 92.59 [88.71, 96.47] |
| 52% | 90.94 [86.69, 95.19] | 89.96 [85.51, 94.41] | 94.20 [90.74, 97.66] | 92.08 [88.08, 96.08] |
| 53% | 90.94 [86.69, 95.19] | 89.96 [85.51, 94.41] | 94.20 [90.74, 97.66] | 92.08 [88.08, 96.08] |
| 54% | 91.61 [87.50, 95.72] | 90.83 [86.55, 95.11] | 94.20 [90.74, 97.66] | 92.52 [88.62, 96.42] |
| 55% | 91.61 [87.50, 95.72] | 90.83 [86.55, 95.11] | 94.20 [90.74, 97.66] | 92.52 [88.62, 96.42] |
| 56% | 91.95 [87.92, 95.98] | 91.27 [87.09, 95.45] | 94.20 [90.74, 97.66] | 92.73 [88.88, 96.58] |
| 57% | 92.28 [88.33, 96.23] | 91.70 [87.61, 95.79] | 94.20 [90.74, 97.66] | 92.95 [89.16, 96.74] |
| 58% | 92.95 [89.16, 96.74] | 92.58 [88.70, 96.46] | 94.20 [90.74, 97.66] | 93.39 [89.71, 97.07] |
| 59% | 93.29 [89.58, 97.00] | 93.01 [89.23, 96.79] | 94.20 [90.74, 97.66] | 93.61 [89.99, 97.23] |
| 60% | 93.62 [90.00, 97.24] | 93.45 [89.78, 97.12] | 94.20 [90.74, 97.66] | 93.83 [90.27, 97.39] |
| 61% | 93.96 [90.43, 97.49] | 93.89 [90.34, 97.44] | 94.20 [90.74, 97.66] | 94.04 [90.53, 97.55] |
| 62% | 93.96 [90.43, 97.49] | 93.89 [90.34, 97.44] | 94.20 [90.74, 97.66] | 94.04 [90.53, 97.55] |
| 63% | 93.96 [90.43, 97.49] | 93.89 [90.34, 97.44] | 94.20 [90.74, 97.66] | 94.04 [90.53, 97.55] |
| 64% | 94.63 [91.29, 97.97] | 94.76 [91.46, 98.06] | 94.20 [90.74, 97.66] | 94.48 [91.10, 97.86] |
| 65% | 94.30 [90.86, 97.74] | 94.76 [91.46, 98.06] | 92.75 [88.91, 96.59] | 93.76 [90.18, 97.34] |
| 66% | 94.30 [90.86, 97.74] | 94.76 [91.46, 98.06] | 92.75 [88.91, 96.59] | 93.76 [90.18, 97.34] |
| 67% | 93.96 [90.43, 97.49] | 94.76 [91.46, 98.06] | 91.30 [87.12, 95.48] | 93.03 [89.26, 96.80] |
| 68% | 93.96 [90.43, 97.49] | 94.76 [91.46, 98.06] | 91.30 [87.12, 95.48] | 93.03 [89.26, 96.80] |
| 69% | 93.96 [90.43, 97.49] | 94.76 [91.46, 98.06] | 91.30 [87.12, 95.48] | 93.03 [89.26, 96.80] |
| 70% | 93.62 [90.00, 97.24] | 94.76 [91.46, 98.06] | 89.86 [85.39, 94.33] | 92.31 [88.36, 96.26] |
| 71% | 93.62 [90.00, 97.24] | 94.76 [91.46, 98.06] | 89.86 [85.39, 94.33] | 92.31 [88.36, 96.26] |
| 72% | 93.96 [90.43, 97.49] | 95.20 [92.03, 98.37] | 89.86 [85.39, 94.33] | 92.53 [88.63, 96.43] |
| 73% | 93.96 [90.43, 97.49] | 95.20 [92.03, 98.37] | 89.86 [85.39, 94.33] | 92.53 [88.63, 96.43] |
| 74% | 94.30 [90.86, 97.74] | 95.63 [92.60, 98.66] | 89.86 [85.39, 94.33] | 92.74 [88.90, 96.58] |
| 75% | 94.30 [90.86, 97.74] | 95.63 [92.60, 98.66] | 89.86 [85.39, 94.33] | 92.74 [88.90, 96.58] |
| 76% | 94.30 [90.86, 97.74] | 95.63 [92.60, 98.66] | 89.86 [85.39, 94.33] | 92.74 [88.90, 96.58] |
| 77% | 94.30 [90.86, 97.74] | 95.63 [92.60, 98.66] | 89.86 [85.39, 94.33] | 92.74 [88.90, 96.58] |
| 78% | 94.30 [90.86, 97.74] | 96.07 [93.19, 98.95] | 88.41 [83.67, 93.15] | 92.24 [88.28, 96.20] |
| 79% | 94.30 [90.86, 97.74] | 96.07 [93.19, 98.95] | 88.41 [83.67, 93.15] | 92.24 [88.28, 96.20] |
| 80% | 94.63 [91.29, 97.97] | 96.51 [93.79, 99.23] | 88.41 [83.67, 93.15] | 92.46 [88.55, 96.37] |
| 81% | 94.63 [91.29, 97.97] | 96.51 [93.79, 99.23] | 88.41 [83.67, 93.15] | 92.46 [88.55, 96.37] |
| 82% | 94.63 [91.29, 97.97] | 96.51 [93.79, 99.23] | 88.41 [83.67, 93.15] | 92.46 [88.55, 96.37] |
| 83% | 94.30 [90.86, 97.74] | 96.51 [93.79, 99.23] | 86.96 [81.97, 91.95] | 91.73 [87.65, 95.81] |
| 84% | 94.30 [90.86, 97.74] | 96.51 [93.79, 99.23] | 86.96 [81.97, 91.95] | 91.73 [87.65, 95.81] |
| 85% | 94.30 [90.86, 97.74] | 96.51 [93.79, 99.23] | 86.96 [81.97, 91.95] | 91.73 [87.65, 95.81] |
| 86% | 94.63 [91.29, 97.97] | 96.94 [94.39, 99.49] | 86.96 [81.97, 91.95] | 91.95 [87.92, 95.98] |
| 87% | 94.63 [91.29, 97.97] | 96.94 [94.39, 99.49] | 86.96 [81.97, 91.95] | 91.95 [87.92, 95.98] |
| 88% | 94.30 [90.86, 97.74] | 96.94 [94.39, 99.49] | 85.51 [80.29, 90.73] | 91.23 [87.04, 95.42] |
| 89% | 93.96 [90.43, 97.49] | 97.38 [95.01, 99.75] | 82.61 [76.99, 88.23] | 89.99 [85.54, 94.44] |
| 90% | 93.62 [90.00, 97.24] | 97.82 [95.66, 99.98] | 79.71 [73.75, 85.67] | 88.76 [84.08, 93.44] |
| 91% | 94.30 [90.86, 97.74] | 98.69 [97.01, 100.00] | 79.71 [73.75, 85.67] | 89.20 [84.60, 93.80] |
| 92% | 93.62 [90.00, 97.24] | 98.69 [97.01, 100.00] | 76.81 [70.56, 83.06] | 87.75 [82.89, 92.61] |
| 93% | 92.95 [89.16, 96.74] | 98.69 [97.01, 100.00] | 73.91 [67.40, 80.42] | 86.30 [81.21, 91.39] |
| 94% | 93.29 [89.58, 97.00] | 99.56 [98.58, 100.00] | 72.46 [65.84, 79.08] | 86.01 [80.87, 91.15] |
| 95% | 93.29 [89.58, 97.00] | 99.56 [98.58, 100.00] | 72.46 [65.84, 79.08] | 86.01 [80.87, 91.15] |
| 96% | 92.62 [88.75, 96.49] | 100.00 [[97.92, 100.00] | 68.12 [61.22, 75.02] | 84.06 [78.64, 89.48] |
| 97% | 91.95 [87.92, 95.98] | 100.00 [97.92, 100.00] | 65.22 [58.16, 72.28] | 82.61 [76.99, 88.23] |
| 98% | 91.28 [87.10, 95.46] | 100.00 [97.92, 100.00] | 62.32 [55.14, 69.50] | 81.16 [75.37, 86.95] |
| 99% | 88.93 [84.28, 93.58] | 100.00 [97.92, 100.00] | 52.17 [44.77, 59.57] | 76.09 [69.77, 82.41] |
| 100% | 78.86 [72.81, 84.91] | 100.00 [97.92, 100.00] | 8.70 [4.52, 12.88] | 54.35 [46.97, 61.73] |

**Supplementary Table 6. Results from Primary Healthcare Clinic 2**

| Risk factor | Accuracy%[95%CI] | Specificity%[95%CI] | Sensitivity%[95%CI] | AUC%[95%CI] |
| --- | --- | --- | --- | --- |
| 0% | 17.71 [13.35, 22.07] | 0.00 [0.00, 0.00] | 100.00 [100.00, 100.00] | 50.00 [44.29, 55.71] |
| 1% | 29.71 [24.50, 34.92] | 14.58 [10.55, 18.61] | 100.00 [100.00, 100.00] | 57.29 [51.65, 62.93] |
| 2% | 38.86 [33.30, 44.42] | 25.69 [20.70, 30.68] | 100.00 [100.00, 100.00] | 62.85 [57.34, 68.36] |
| 3% | 40.00 [34.41, 45.59] | 27.08 [22.01, 32.15] | 100.00 [100.00, 100.00] | 63.54 [58.05, 69.03] |
| 4% | 44.00 [38.34, 49.66] | 31.94 [26.62, 37.26] | 100.00 [100.00, 100.00] | 65.97 [60.56, 71.38] |
| 5% | 46.86 [41.17, 52.55] | 35.42 [29.96, 40.88] | 100.00 [100.00, 100.00] | 67.71 [62.37, 73.05] |
| 6% | 49.14 [43.44, 54.84] | 38.19 [32.65, 43.73] | 100.00 [100.00, 100.00] | 69.10 [63.83, 74.37] |
| 7% | 50.86 [45.16, 56.56] | 40.28 [34.68, 45.88] | 100.00 [100.00, 100.00] | 70.14 [64.92, 75.36] |
| 8% | 52.57 [46.87, 58.27] | 42.36 [36.72, 48.00] | 100.00 [100.00, 100.00] | 71.18 [66.01, 76.35] |
| 9% | 56.57 [50.91, 62.23] | 47.22 [41.52, 52.92] | 100.00 [100.00, 100.00] | 73.61 [68.58, 78.64] |
| 10% | 59.43 [53.83, 65.03] | 50.69 [44.98, 56.40] | 100.00 [100.00, 100.00] | 75.35 [70.43, 80.27] |
| 11% | 61.71 [56.16, 67.26] | 53.47 [47.78, 59.16] | 100.00 [100.00, 100.00] | 76.74 [71.92, 81.56] |
| 12% | 65.14 [59.70, 70.58] | 57.64 [52.00, 63.28] | 100.00 [100.00, 100.00] | 78.82 [74.16, 83.48] |
| 13% | 70.29 [65.08, 75.50] | 63.89 [58.41, 69.37] | 100.00 [100.00, 100.00] | 81.94 [77.55, 86.33] |
| 14% | 74.29 [69.30, 79.28] | 68.75 [63.46, 74.04] | 100.00 [100.00, 100.00] | 84.38 [80.24, 88.52] |
| 15% | 78.86 [74.20, 83.52] | 74.31 [69.32, 79.30] | 100.00 [100.00, 100.00] | 87.15 [83.33, 90.97] |
| 16% | 82.86 [78.56, 87.16] | 79.17 [74.54, 83.80] | 100.00 [100.00, 100.00] | 89.58 [86.09, 93.07] |
| 17% | 86.86 [83.00, 90.72] | 84.03 [79.85, 88.21] | 100.00 [100.00, 100.00] | 92.01 [88.92, 95.10] |
| 18% | 89.14 [85.59, 92.69] | 86.81 [82.95, 90.67] | 100.00 [100.00, 100.00] | 93.40 [90.57, 96.23] |
| 19% | 90.29 [86.91, 93.67] | 88.19 [84.51, 91.87] | 100.00 [100.00, 100.00] | 94.10 [91.41, 96.79] |
| 20% | 92.00 [88.90, 95.10] | 90.28 [86.90, 93.66] | 100.00 [100.00, 100.00] | 95.14 [92.69, 97.59] |
| 21% | 93.14 [90.26, 96.02] | 91.67 [88.52, 94.82] | 100.00 [100.00, 100.00] | 95.83 [93.55, 98.11] |
| 22% | 93.71 [90.94, 96.48] | 92.36 [89.33, 95.39] | 100.00 [100.00, 100.00] | 96.18 [93.99, 98.37] |
| 23% | 94.86 [92.34, 97.38] | 93.75 [90.99, 96.51] | 100.00 [100.00, 100.00] | 96.88 [94.90, 98.86] |
| 24% | 94.86 [92.34, 97.38] | 93.75 [90.99, 96.51] | 100.00 [100.00, 100.00] | 96.88 [94.90, 98.86] |
| 25% | 94.86 [92.34, 97.38] | 93.75 [90.99, 96.51] | 100.00 [100.00, 100.00] | 96.88 [94.90, 98.86] |
| 26% | 95.43 [93.05, 97.81] | 94.44 [91.83, 97.05] | 100.00 [100.00, 100.00] | 97.22 [95.34, 99.10] |
| 27% | 96.00 [93.76, 98.24] | 95.14 [92.69, 97.59] | 100.00 [100.00, 100.00] | 97.57 [95.81, 99.33] |
| 28% | 95.43 [93.05, 97.81] | 95.14 [92.69, 97.59] | 96.77 [94.75, 98.79] | 95.96 [93.71, 98.21] |
| 29% | 96.00 [93.76, 98.24] | 95.83 [93.55, 98.11] | 96.77 [94.75, 98.79] | 96.30 [94.15, 98.45] |
| 30% | 96.00 [93.76, 98.24] | 95.83 [93.55, 98.11] | 96.77 [94.75, 98.79] | 96.30 [94.15, 98.45] |
| 31% | 96.00 [93.76, 98.24] | 95.83 [93.55, 98.11] | 96.77 [94.75, 98.79] | 96.30 [94.15, 98.45] |
| 32% | 96.57 [94.49, 98.65] | 96.53 [94.44, 98.62] | 96.77 [94.75, 98.79] | 96.65 [94.60, 98.70] |
| 33% | 96.57 [94.49, 98.65] | 96.53 [94.44, 98.62] | 96.77 [94.75, 98.79] | 96.65 [94.60, 98.70] |
| 34% | 96.57 [94.49, 98.65] | 96.53 [94.44, 98.62] | 96.77 [94.75, 98.79] | 96.65 [94.60, 98.70] |
| 35% | 96.57 [94.49, 98.65] | 96.53 [94.44, 98.62] | 96.77 [94.75, 98.79] | 96.65 [94.60, 98.70] |
| 36% | 96.57 [94.49, 98.65] | 96.53 [94.44, 98.62] | 96.77 [94.75, 98.79] | 96.65 [94.60, 98.70] |
| 37% | 96.57 [94.49, 98.65] | 96.53 [94.44, 98.62] | 96.77 [94.75, 98.79] | 96.65 [94.60, 98.70] |
| 38% | 96.57 [94.49, 98.65] | 96.53 [94.44, 98.62] | 96.77 [94.75, 98.79] | 96.65 [94.60, 98.70] |
| 39% | 96.57 [94.49, 98.65] | 96.53 [94.44, 98.62] | 96.77 [94.75, 98.79] | 96.65 [94.60, 98.70] |
| 40% | 96.57 [94.49, 98.65] | 96.53 [94.44, 98.62] | 96.77 [94.75, 98.79] | 96.65 [94.60, 98.70] |
| 41% | 96.57 [94.49, 98.65] | 96.53 [94.44, 98.62] | 96.77 [94.75, 98.79] | 96.65 [94.60, 98.70] |
| 42% | 96.57 [94.49, 98.65] | 96.53 [94.44, 98.62] | 96.77 [94.75, 98.79] | 96.65 [94.60, 98.70] |
| 43% | 96.57 [94.49, 98.65] | 96.53 [94.44, 98.62] | 96.77 [94.75, 98.79] | 96.65 [94.60, 98.70] |
| 44% | 97.14 [95.24, 99.04] | 97.22 [95.34, 99.10] | 96.77 [94.75, 98.79] | 97.00 [95.05, 98.95] |
| 45% | 97.14 [95.24, 99.04] | 97.22 [95.34, 99.10] | 96.77 [94.75, 98.79] | 97.00 [95.05, 98.95] |
| 46% | 97.14 [95.24, 99.04] | 97.22 [95.34, 99.10] | 96.77 [94.75, 98.79] | 97.00 [95.05, 98.95] |
| 47% | 97.14 [95.24, 99.04] | 97.22 [95.34, 99.10] | 96.77 [94.75, 98.79] | 97.00 [95.05, 98.95] |
| 48% | 97.71 [96.00, 99.42] | 97.92 [96.29, 99.55] | 96.77 [94.75, 98.79] | 97.35 [95.52, 99.18] |
| 49% | 98.29 [96.81, 99.77] | 98.61 [97.27, 99.95] | 96.77 [94.75, 98.79] | 97.69 [95.98, 99.40] |
| 50% | 98.29 [96.81, 99.77] | 98.61 [97.27, 99.95] | 96.77 [94.75, 98.79] | 97.69 [95.98, 99.40] |
| 51% | 98.29 [96.81, 99.77] | 98.61 [97.27, 99.95] | 96.77 [94.75, 98.79] | 97.69 [95.98, 99.40] |
| 52% | 98.29 [96.81, 99.77] | 98.61 [97.27, 99.95] | 96.77 [94.75, 98.79] | 97.69 [95.98, 99.40] |
| 53% | 98.29 [96.81, 99.77] | 98.61 [97.27, 99.95] | 96.77 [94.75, 98.79] | 97.69 [95.98, 99.40] |
| 54% | 98.29 [96.81, 99.77] | 98.61 [97.27, 99.95] | 96.77 [94.75, 98.79] | 97.69 [95.98, 99.40] |
| 55% | 98.29 [96.81, 99.77] | 98.61 [97.27, 99.95] | 96.77 [94.75, 98.79] | 97.69 [95.98, 99.40] |
| 56% | 98.86 [97.65, 100.00] | 99.31 [98.37, 100.00] | 96.77 [94.75, 98.79] | 98.04 [96.46, 99.62] |
| 57% | 98.86 [97.65, 100.00] | 99.31 [98.37, 100.00] | 96.77 [94.75, 98.79] | 98.04 [96.46, 99.62] |
| 58% | 98.86 [97.65, 100.00] | 99.31 [98.37, 100.00] | 96.77 [94.75, 98.79] | 98.04 [96.46, 99.62] |
| 59% | 98.86 [97.65, 100.00] | 99.31 [98.37, 100.00] | 96.77 [94.75, 98.79] | 98.04 [96.46, 99.62] |
| 60% | 98.86 [97.65, 100.00] | 99.31 [98.37, 100.00] | 96.77 [94.75, 98.79] | 98.04 [96.46, 99.62] |
| 61% | 96.00 [93.76, 98.24] | 95.83 [93.55, 98.11] | 96.77 [94.75, 98.79] | 96.30 [94.15, 98.45] |
| 62% | 96.57 [94.49, 98.65] | 96.53 [94.44, 98.62] | 96.77 [94.75, 98.79] | 96.65 [94.60, 98.70] |
| 63% | 96.57 [94.49, 98.65] | 96.53 [94.44, 98.62] | 96.77 [94.75, 98.79] | 96.65 [94.60, 98.70] |
| 64% | 96.57 [94.49, 98.65] | 96.53 [94.44, 98.62] | 96.77 [94.75, 98.79] | 96.65 [94.60, 98.70] |
| 65% | 96.57 [94.49, 98.65] | 96.53 [94.44, 98.62] | 96.77 [94.75, 98.79] | 96.65 [94.60, 98.70] |
| 66% | 96.57 [94.49, 98.65] | 96.53 [94.44, 98.62] | 96.77 [94.75, 98.79] | 96.65 [94.60, 98.70] |
| 67% | 96.57 [94.49, 98.65] | 96.53 [94.44, 98.62] | 96.77 [94.75, 98.79] | 96.65 [94.60, 98.70] |
| 68% | 96.57 [94.49, 98.65] | 96.53 [94.44, 98.62] | 96.77 [94.75, 98.79] | 96.65 [94.60, 98.70] |
| 69% | 96.57 [94.49, 98.65] | 96.53 [94.44, 98.62] | 96.77 [94.75, 98.79] | 96.65 [94.60, 98.70] |
| 70% | 96.57 [94.49, 98.65] | 96.53 [94.44, 98.62] | 96.77 [94.75, 98.79] | 96.65 [94.60, 98.70] |
| 71% | 98.86 [97.65, 100.00] | 99.31 [98.37, 100.00] | 96.77 [94.75, 98.79] | 98.04 [96.46, 99.62] |
| 72% | 98.86 [97.65, 100.00] | 99.31 [98.37, 100.00] | 96.77 [94.75, 98.79] | 98.04 [96.46, 99.62] |
| 73% | 98.29 [96.81, 99.77] | 99.31 [98.37, 100.00] | 93.55 [90.75, 96.35] | 96.43 [94.31, 98.55] |
| 74% | 98.29 [96.81, 99.77] | 99.31 [98.37, 100.00] | 93.55 [90.75, 96.35] | 96.43 [94.31, 98.55] |
| 75% | 98.29 [96.81, 99.77] | 99.31 [98.37, 100.00] | 93.55 [90.75, 96.35] | 96.43 [94.31, 98.55] |
| 76% | 98.29 [96.81, 99.77] | 99.31 [98.37, 100.00] | 93.55 [90.75, 96.35] | 96.43 [94.31, 98.55] |
| 77% | 98.29 [96.81, 99.77] | 99.31 [98.37, 100.00] | 93.55 [90.75, 96.35] | 96.43 [94.31, 98.55] |
| 78% | 98.29 [96.81, 99.77] | 99.31 [98.37, 100.00] | 93.55 [90.75, 96.35] | 96.43 [94.31, 98.55] |
| 79% | 98.29 [96.81, 99.77] | 99.31 [98.37, 100.00] | 93.55 [90.75, 96.35] | 96.43 [94.31, 98.55] |
| 80% | 98.29 [96.81, 99.77] | 99.31 [98.37, 100.00] | 93.55 [90.75, 96.35] | 96.43 [94.31, 98.55] |
| 81% | 98.29 [96.81, 99.77] | 99.31 [98.37, 100.00] | 93.55 [90.75, 96.35] | 96.43 [94.31, 98.55] |
| 82% | 98.29 [96.81, 99.77] | 99.31 [98.37, 100.00] | 93.55 [90.75, 96.35] | 96.43 [94.31, 98.55] |
| 83% | 98.29 [96.81, 99.77] | 99.31 [98.37, 100.00] | 93.55 [90.75, 96.35] | 96.43 [94.31, 98.55] |
| 84% | 98.29 [96.81, 99.77] | 99.31 [98.37, 100.00] | 93.55 [90.75, 96.35] | 96.43 [94.31, 98.55] |
| 85% | 97.71 [96.00, 99.42] | 99.31 [98.37, 100.00] | 90.32 [86.95, 93.69] | 94.81 [92.28, 97.34] |
| 86% | 97.14 [95.24, 99.04] | 99.31 [98.37, 100.00] | 87.10 [83.27, 90.93] | 93.20 [90.33, 96.07] |
| 87% | 96.00 [93.76, 98.24] | 99.31 [98.37, 100.00] | 80.65 [76.14, 85.16] | 89.98 [86.55, 93.41] |
| 88% | 96.00 [93.76, 98.24] | 99.31 [98.37, 100.00] | 80.65 [76.14, 85.16] | 89.98 [86.55, 93.41] |
| 89% | 96.00 [93.76, 98.24] | 99.31 [98.37, 100.00] | 80.65 [76.14, 85.16] | 89.98 [86.55, 93.41] |
| 90% | 96.00 [93.76, 98.24] | 99.31 [98.37, 100.00] | 80.65 [76.14, 85.16] | 89.98 [86.55, 93.41] |
| 91% | 96.00 [93.76, 98.24] | 99.31 [98.37, 100.00] | 80.65 [76.14, 85.16] | 89.98 [86.55, 93.41] |
| 92% | 96.00 [93.76, 98.24] | 99.31 [98.37, 100.00] | 80.65 [76.14, 85.16] | 89.98 [86.55, 93.41] |
| 93% | 96.57 [94.49, 98.65] | 100.00 [100.00, 100.00] | 80.65 [76.14, 85.16] | 90.32 [86.95, 93.69] |
| 94% | 96.00 [93.76, 98.24] | 100.00 [100.00, 100.00] | 77.42 [72.65, 82.19] | 88.71 [85.10, 92.32] |
| 95% | 95.43 [93.05, 97.81] | 100.00 [100.00, 100.00] | 74.19 [69.20, 79.18] | 87.10 [83.27, 90.93] |
| 96% | 94.29 [91.64, 96.94] | 100.00 [100.00, 100.00] | 67.74 [62.41, 73.07] | 83.87 [79.67, 88.07] |
| 97% | 93.71 [90.94, 96.48] | 100.00 [100.00, 100.00] | 64.52 [59.06, 69.98] | 82.26 [77.90, 86.62] |
| 98% | 92.57 [89.58, 95.56] | 100.00 [100.00, 100.00] | 58.06 [52.43, 63.69] | 79.03 [74.38, 83.68] |
| 99% | 89.71 [86.24, 93.18] | 100.00 [100.00, 100.00] | 41.94 [36.31, 47.57] | 70.97 [65.79, 76.15] |
| 100% | 85.14 [81.08, 89.20] | 100.00 [100.00, 100.00] | 16.13 [11.93, 20.33] | 58.06 [52.43, 63.69] |


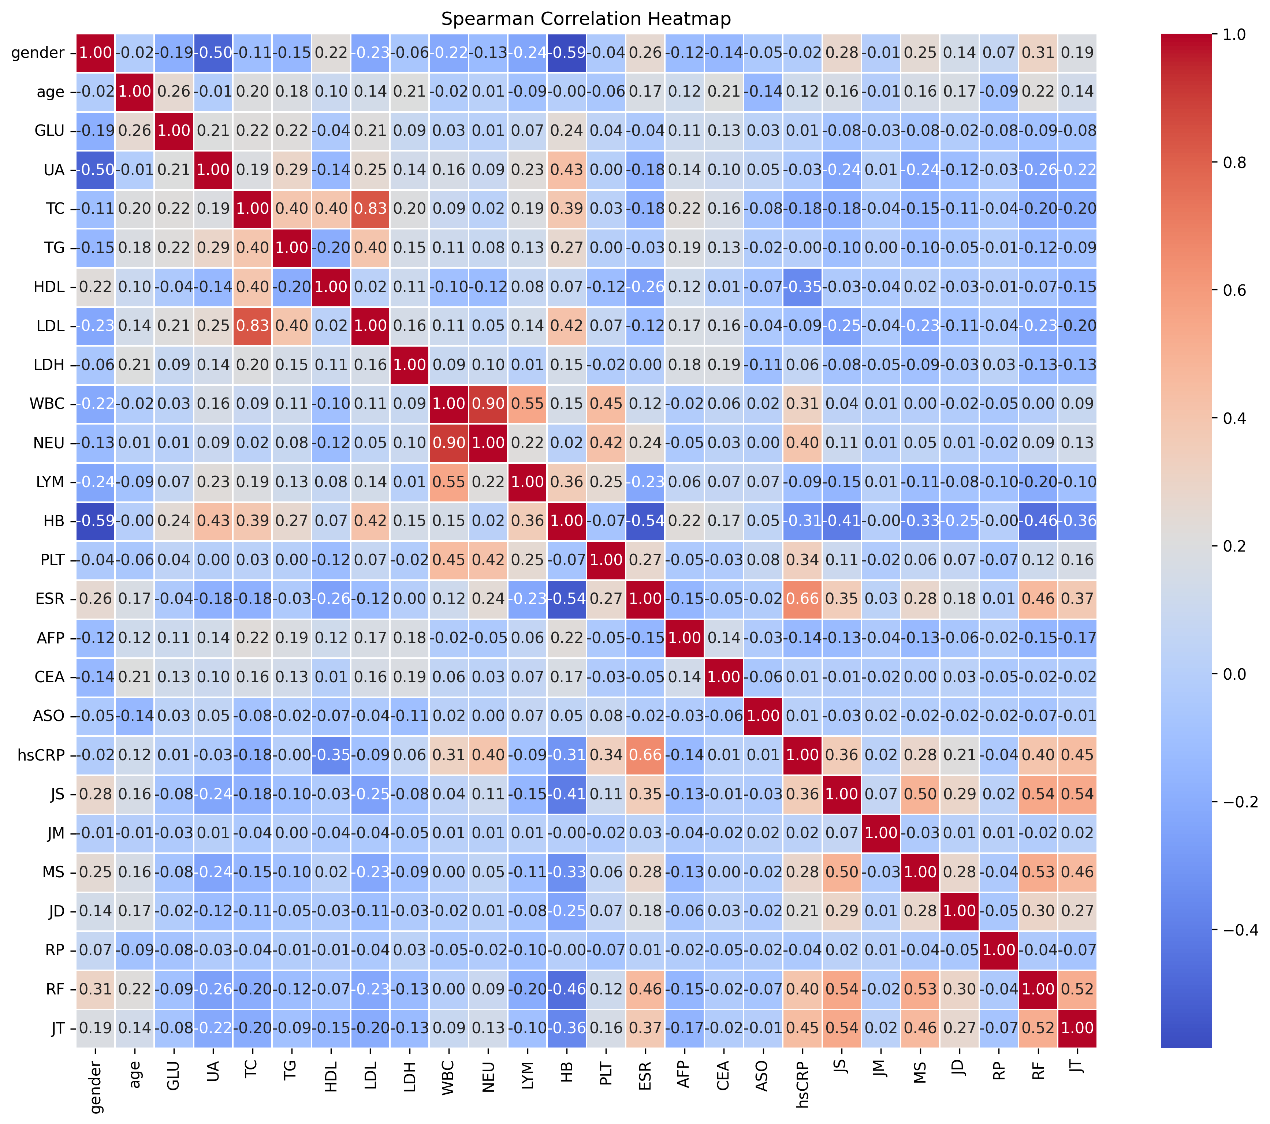


**Supplementary Figure 1. Correlation Analysis of 26 Features.**

**Figure Legend:**

Supplementary Figure 1. Spearman correlation heatmap illustrating the correlation coefficients (ranging from -1 to 1) between variables. Red indicates positive correlation, blue indicates negative correlation, and color intensity represents the strength of the correlation.
